# Supplementary material
Source: PubMed Central journal article supplement (PMC2323327)

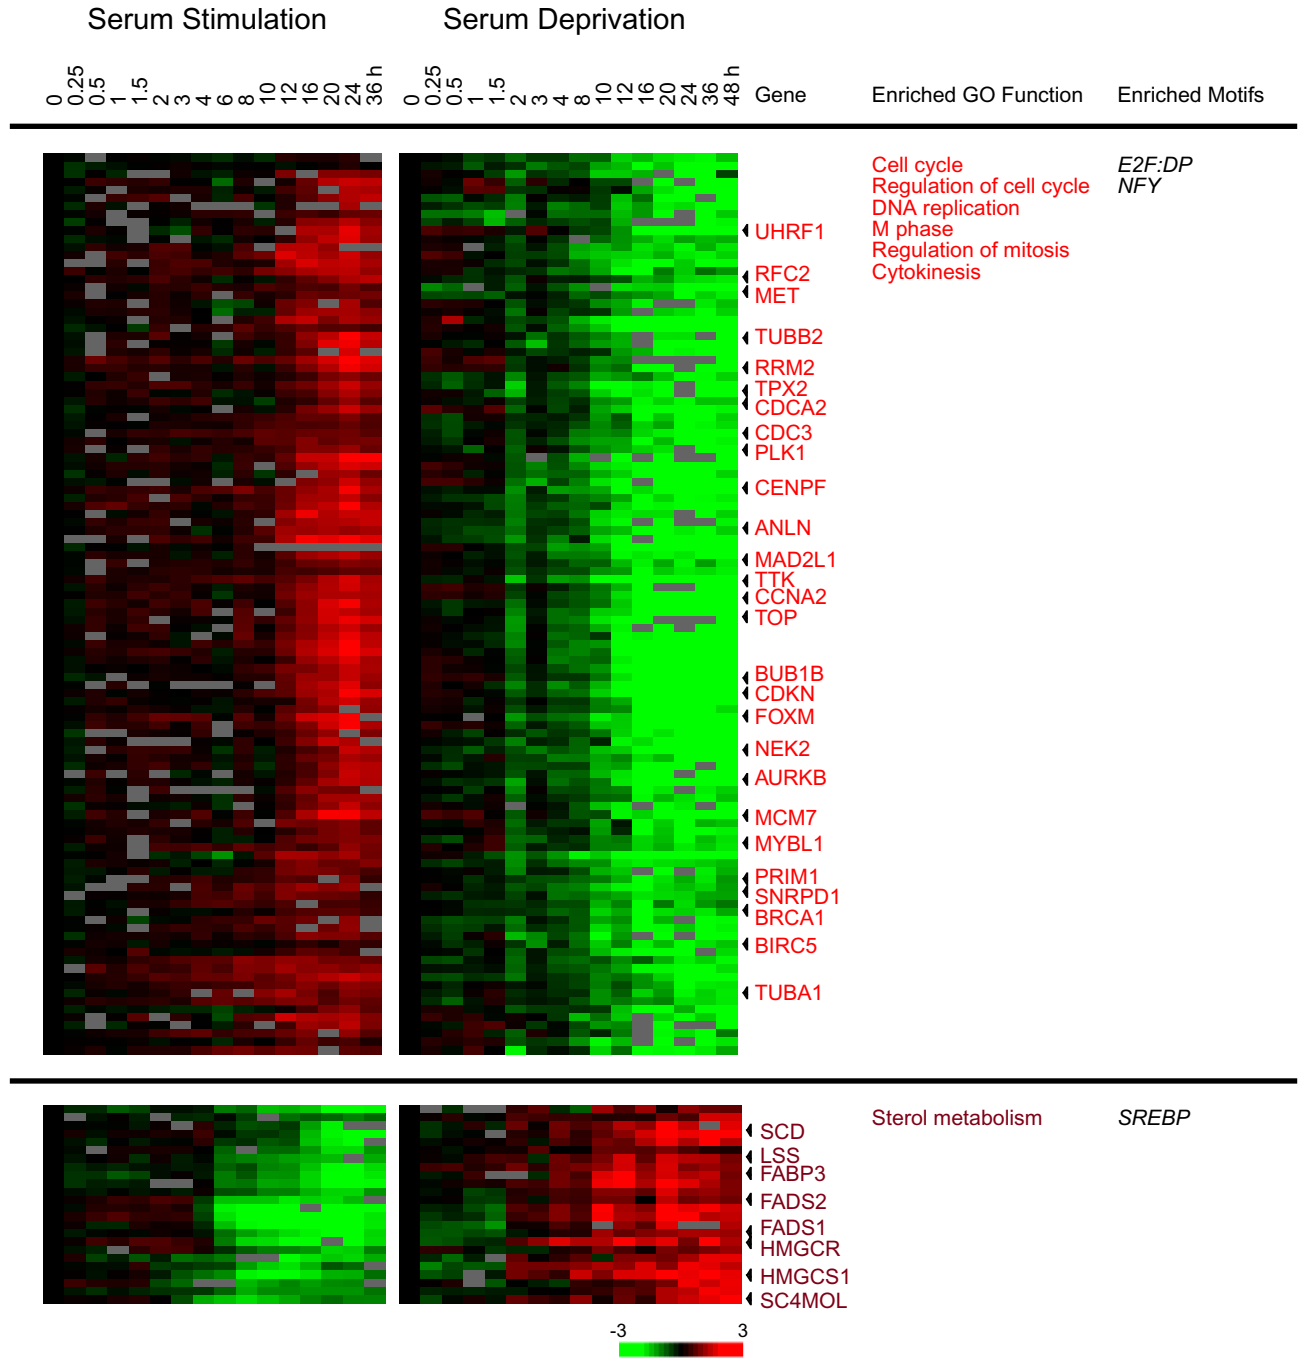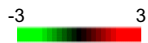

Supplement: pgen.0030091.sg001.pdf [file pgen.0030091.sg001.pdf]
